# Supplementary material
Source: publisher figshare collection journal article supplement (https://tandf.figshare.com/ndownloader/files/17630744)
Supplement: Supplementary file 1 [file 17630744]

**New acidic pyrophosphate CoK1.078N0.922(H2P2O7)2.2H2O.**

**Crystal structure and vibrational spectroscopy**

***F. Z. Elhafiane 1, K. Brouzi 1, R. Khaoulaf2*, L. Rghioui2, M. Harcharras 3***

1Energie Matériaux et Développement Durable, EMDD-CERNE2D, EST B.P 227 Sale Medina, Mohammed V University in Rabat, Morocco.

2Laboratory of Spectroscopy, Molecular Modeling, Materials, Nanomaterials, Water and Environment, LS3MN2E-CERNE2D, Faculty of Sciences Av Ibn Battouta, B.P 1014, Rabat 10000, Mohammed V University in Rabat, Morocco.

3Material and Environmental Engineering Laboratory, Modeling and Application, Department of Chemistry, Faculty of Science, Ibn Tofail University in Kenitra, Morocco.

*Corresponding Authors**:**[rkhaoulaf2000@yahoo.fr](mailto:rkhaoulaf2000@yahoo.fr)

**Supplemental Materials**

**Table S 1**: Crystal data and structure refinement forCoK1.078N0.922(H2P2O7)2.2H2O

| Empirical formula  Shape, colour  Temperature  Wavelength  Size [mm]  Unit cell reflections  Formula weight  Crystal system, space group  Bond precision  Unit cell dimensions  Z  Calculated density  Absorption coefficient F(000)  Limiting indices  θ range for data collection  R(reflections)  wR2(reflections)= wR  Data completeness  Max. and min. transmission  Refinement method  Data/restraints/parameters  Goodness-of-fit on F2  Final R indices [I>3σ (I)]  R indices (all data) | CoH8 K1.078 N0.922 O16P4  polygonal, pink  296K  0.71073Ǻ  0.089 x 0.048 x 0.032  9295  502  Triclinic, Pī  P–O=0.0014 Ǻ  a = 6.9374(4) Ǻ  b = 7.3329(4) Ǻ  c = 7.7036(4) Ǻ  α =80.898(5) ˚  β =71.413(5) ˚  γ = 85.825(5) ˚  V = 366.67(4) Ǻ3  1  2.2731 g/m3  1.998 mm-1  250  -10≤h≤10  -11≤k≤11  -11≤l≤11  3.48 to 32.72 deg.  0.0312( 2072)  0.0381( 5053)  1.866, Theta(max)= 32.720  1 and 0.684  Full-matrix least-squares on F2 (FMLS)  5053 / 5 / 120  1.030  R1=0.0312, wR2=0.0395  R1=0.0351, wR2=0.0895 |
| --- | --- |

**Table S 2:** Atomic coordinates (Å) and isotropic or equivalent isotropic displacement parameters (Å2) for CoK1.078N0.922(H2P2O7)2.2H2O.

| Atoms | x | y | z | Uiso/Ueq | Occ. (<1) |
| --- | --- | --- | --- | --- | --- |
| Co | 0.5 | 0.5 | 0.5 | 0.01619(12) |  |
| P1 | 0.75677(7) | 0.19956(7) | 0.24201(6) | 0.01668(15) |
| P2 | 0.33696(7) | 0.26489(7) | 0.24362(6) | 0.01713(15) |
| K1 | 0.09819(12) | 0.72342(11) | 0.29650(10) | 0.0412(3) | 0.593 |
| N1 | 0.09819(12) | 0.72342(11) | 0.29650(10) | 0.0412(3) | 0.407 |
| O1 | 0.93872(18) | 0.2239(2) | 0.06218(17) | 0.0261(5) |  |
| O2 | 0.2459(2) | 0.07172(19) | 0.33239(18) | 0.0261(5) |
| O3 | 0.25998(18) | 0.33788(19) | 0.08495(16) | 0.0237(5) |
| O4 | 0.57587(18) | 0.23114(19) | 0.15185(16) | 0.0238(5) |
| O5 | 0.74769(18) | 0.34319(19) | 0.36202(17) | 0.0234(5) |
| O6 | 0.7454(2)) | 0.00312(19 | 0.33817(17) | 0.0286(5) |
| O7 | 0.30324(18) | 0.38660(18) | 0.38975(16) | 0.0216(4) |
| O8 | 0.5546(2) | 0.71111(19) | 0.27558(17) | 0.0287(5) |
| H1o8 | 0.614(3) | 0.8022(18) | 0.280(2) | 0.0345 |
| H2o8 | 0.608(3) | 0.687(2) | 0.1703(11) | 0.0345 |
| H1o2 | 0.272(3) | 0.043(3) | 0.4297(14) | 0.0313 |
| H1o1 | 1.0407(18) | 0.265(3) | 0.072(3) | 0.0313 |

**Table S 3**: Anisotropic thermal parameters (Å2) for CoK1.078N0.922(H2P2O7)2.2H2O

| Atoms | U11 | U22 | U33 | U12 | U13 | U23 |
| --- | --- | --- | --- | --- | --- | --- |
| Co | 0.01728(18) | 0.0176(2) | 0.01507(17) | -0.00192(14) | -0.00522(14) | -0.00546(14) |
| P1 | 0.0151(2) | 0.0215(3) | 0.0144(2) | -0.00185(19) | -0.00462(18) | -0.00474(19) |
| P2 | 0.0153(2) | 0.0220(3) | 0.0160(2) | -0.00304(19) | -0.00584(18) | -0.00492(19) |
| K1 | 0.0496(5) | 0.0411(5) | 0.0359(5) | 0.0095(4) | -0.0191(4) | -0.0072(4) |
| N1 | 0.0496(5) | 0.0411(5) | 0.0359(5) | 0.0095(4) | -0.0191(4) | -0.0072(4) |
| O1 | 0.0178(6) | 0.0435(9) | 0.0178(6) | -0.0082(6) | -0.0021(5) | -0.0102(6) |
| O2 | 0.0336(8) | 0.0245(8) | 0.0234(7) | -0.0102(6) | -0.0120(6) | -0.0023(6) |
| O3 | 0.0197(6) | 0.0343(8) | 0.0189(6) | -0.0033(6) | -0.0093(5) | -0.0013(6) |
| O4 | 0.0155(6) | 0.0388(9) | 0.0213(6) | 0.0005(6) | -0.0080(5) | -0.0124(6) |
| O5 | 0.0208(7) | 0.0297(8) | 0.0243(7) | 0.0030(6) | -0.0092(5) | -0.0145(6) |
| O6 | 0.0402(8) | 0.0230(8) | 0.0259(7) | -0.0074(6) | -0.0157(6) | 0.0014(6) |
| O7 | 0.0198(6) | 0.0258(7) | 0.0223(6) | -0.0015(5) | -0.0070(5) | -0.0113(6) |
| O8 | 0.0408(8) | 0.0252(8) | 0.0173(7) | -0.0101(6) | -0.0028(6) | -0.0037(6) |

**Table S 4**: Bond distances (Å) for CoK1.078N0.922(H2P2O7)2.2H2O.

| P1–O1 1.544(1)  P1–O4 1.604(1)  P1–O5 1.493(2)  P1–O6 1.507(1)  P2–O2 1.556(1)  P2–O3 1.494(1)  P2–O4 1.599(1)  P2–O7 1.496(1) | K1–O7 2.867(2)  K1–O8 3.114(2)  K1–O7 3.109(1)  K1–O1 2.819(2)  K1–O2 2.904(2)  K1–O5 3.100(2)  K1–O6 3.046(2) | 2 x Co1–O5 2.083  2 x Co1–O7 2.099  2 x Co1–O8 2.086 | O1–H1o1 0.82(17)  O2–H1o2 0.82(15)  O8–H1o8 0.82(16)  O8–H2o8 0.82(10) |
| --- | --- | --- | --- |

**Table S 5**: Angles (deg) for CoK1.078N0.922(H2P2O7)2.2H2O.

| O5-Co1-O7 92.42  O5-Co1-O8 91.99  O5-Co1-O5 180.00  O5-Co1-O7 87.58  O5-Co1-O8 88.01  O7-Co1-O8 87.95  O7-Co1-O5 87.58  O7-Co1-O7 180.00  O7-Co1-O8 92.05  O8-Co1-O5 88.01  O8-Co1-O7 92.05  O8-Co1-O8 180.00  O5-Co1-O7 92.42  O5-Co1-O8 91.99  O7-Co1-O8 87.95  O1-P1-O4 98.62(7)  O1-P1-O5 112.47(8)  O1-P1-O6 111.34(8)  O4-P1-O5 110.89(7)  O4-P1-O6 107.13(8)  O5-P1-O6 115.03(8)  O2-P2-O3 109.20(8)  O2-P2-O4 106.44(7)  O2-P2-O7 110.02(8)  O3-P2-O4 104.96(7)  O3-P2-O7 116.43(8)  O4-P2-O7 109.26(7)  O7-K1-O8 57.95(4)  O7-K1-O7 92.53(4)  O7-K1-O1 114.92(5)  O7-K1-O2 118.94(5)  O7-K1-O5 57.86(4)  O7-K1-O6 155.92(5)  O8-K1-O7 134.06(4)  O8-K1-O1 110.37(5)  O8-K1-O2 65.79(4)  O8-K1-O5 55.56(4)  O8-K1-O6 138.51(5)  O7-K1-O1 114.14(4)  O7-K1-O2 111.70(4)  O7-K1-O5 79.38(4)  O7-K1-O6 63.42(4)  O1-K1-O2 104.74(5)  O1-K1-O5 165.81(5)  O1-K1-O6 78.74(4)  O2-K1-O5 72.33(4)  O2-K1-O6 72.73(4) | O5-K1-O6 112.68(4)  P1-O1-H1o1 115(1)  P1-O1-K1 124.16(7)  H1o1-O1-K1 116(1)  P2-O2-H1o2 108(1)  P2-O2-K1 150.08(8)  H1o2-O2-K1 100(1)  P1-O4-P2 130.87(9)  Co1-O5-P1 129.60  Co1-O5-K1 91.19  P1-O5-K1 123.63(7)  P1-O6-K1 125.99(7)  Co1-O7-P2 133.17  Co1-O7-K1 97.63  Co1-O7-K1 109.34  P2-O7-K1 110.12(7)  P2-O7-K1 108.85(6)  K1-O7-K1 87.47(4)  Co1-O8-K1 90.76  Co1-O8-H1o8 118  Co1-O8-H2o8 120  K1-O8-H1o8 123(1)  K1-O8-H2o8 100(1)  H1o8-O8-H2o8 105(2)  O1-P1-O4 98.62(7)  O1-P1-O5 112.47(8)  O1-P1-O6 111.34(8)  O4-P1-O5 110.89(7)  O4-P1-O6 107.13(8)  O5-P1-O6 115.03(8)  O2-P2-O3 109.20(8)  O2-P2-O4 106.44(7)  O2-P2-O7 110.02(8)  O3-P2-O4 104.96(7)  O3-P2-O7 116.43(8)  O4-P2-O7 109.26(7)  O7-K1 O7 92.53(4)  O7-K1-O8 134.06(4)  O7-K1 O1 114.14(4)  O7-K1-O2 111.70(4)  O7-K1-O5 79.38(4)  O7-K1-O6 63.42(4)  O7-K1-O8 57.95(4)  O7-K1-O1 114.92(5)  O7-K1-O2 118.94(5)  O7-K1-O5 57.86(4)  O7-K1-O6 155.92(5) | O8-K1 O1 110.37(5)  O8-K1-O2 65.79(4)  O8-K1 O5 55.56(4)  O8-K1 O6 138.51(5)  O1-K1 O2 104.74(5)  O1-K1 O5 165.81(5)  O1-K1 O6 78.74(4)  O2-K1 O5 72.33(4)  O2-K1 O6 72.73(4)  O5-K1 O6 112.68(4)  P1-O1 H1o1 115(1)  P1-O1 K1 124.16(7)  H1o1-O1-K1 116(1)  P2-O2 H1o2 108(1)  P2-O2-K1 150.08(8)  H1o2-O2-K1 100(1)  **P1-O4-P2 130.87(9)**  P1-O5-Co1 129.60  P1-O5-K1 123.63(7)  Co1-O5-K1 91.19  P1-O6-K1 125.99(7)  K1-O7-P2 108.85(6)  K1-O7-K1 87.47(4)  K1-O7-Co1 109.34  P2-O7-K1 110.12(7)  P2-O7-Co1 133.17  K1-O7-Co1 97.63  K1-O8-H1o8 123(1)  K1-O8-H2o8 100(1)  K1-O8-Co1 90.76  H1o8-O8-H2o8 105(2)  H1o8-O8-Co1 118  H2o8-O8-Co1 120  O5-Co1-O7 92.42  O5-Co1-O8 91.99  O5-Co1-O5 180.00  O7-Co1-O8 87.95  O7-Co1-O5 87.58  O8-Co1-O5 88.01  O5-K1-O7 57.86(4)  O5-K1-O8 55.56(4)  O7-K1-O8 57.95(4)  K1-O5-Co1 91.19  Co1-O5-K1 91.19  Co1-O7-K1 97.63  Co1-O8-K1 90.76 |
| --- | --- | --- |

**Table S 6**: Hydrogen bonding scheme (Å, deg.) for CoK1.078N0.922(H2P2O7)2.2H2O

| D––H. . .A | D––H | H. . .A | D. . .A | D––H––A |
| --- | --- | --- | --- | --- |
| O8 ––H1o8. . . O6 | 0.820(16) | 1.968(18) | 2.778(2) | 169.3(17) |
| O8 ––H2o8 . . .O3 | 0.820(10) | 1.918(9) | 2.7328(17) | 172.7(18) |
| O2 ––H1o2 . . .O6 | 0.820(15) | 1.732(12) | 2.529(2) | 163.6(19) |
| O1 ––H1o1. . . O3 | 0.820(17) | 1.684(17) | 2.503(2) | 176.0(19) |

**Table S 7**: Comparison of POP bridging angles for M2M’(H2P2O7)2.2H2O inorganic acidic pyrophosphates compounds

| K2M(H2P2O7)2.2H2O(t) | | | | | | | |
| --- | --- | --- | --- | --- | --- | --- | --- |
| M | Ni [1] | Zn [2] | Mg [3] | | Co [10] | | Cu [14] |
| POP(°) | 130.1(2) | 128.85 (6) | 129.7(1) | | 130.90 (19) | | 129.9(2) |
| K2M(H2P2O7)2.2H2O(o) | | | | | | | |
| M | Mn [11] | Ni [12] | Cu [14] | | Zn [21] | | |
| POP(°) | 130.86 (13) | 127.35(10) | 127.1(1) | | 129.5(5) | | |
| (NH4)2M(H2P2O7)2.2H2O(t) | | | | | | | |
| M | Mn [4] | Zn [5] | Co [6] | | Ni [7] | | |
| POP(°) | 131.71(7) | 131.2(2) | 131.3 (1) | | 130.4(1) | | |
| Tl2M(H2P2O7)2.2H2O(t) [8] | | | | | | | |
| M | Zn | Co | | Mg | Mn | Ni | |
| POP(°) | 128.5(5) | 129.1(5) | | 142.2(13) | 130.6(4) | 128.9(3) | |
|  | Na4Mg2(H2P2O7)4.8H2O(m) [13] | | | NaMnNH4H2P2O7.3H2O(m) [17] | | | |
| POP(°) | 131.21(5) | | | 125.53(13) | | | |

(t): triclinic; (o): orthorhombic; (m): monoclinic.

***Table S 8:*** *Correlation scheme for the internal modes of (H2P2O7)2- anions in M2Co(H2P2O7)2.2H2O.*

| GM = C1 | GS = C1 | GF = Ci |
| --- | --- | --- |
| 27A(IR,Ra) | 27A(Ra,IR) | 27 Ag(Ra)  27 Au(IR) |
| Activities **G.M**  Raman 27  Infrared 27 Coincidences 27 | **G.S**.  27  27  27 | **G.F**  27  27  0 |

GM =Molecular group, Gs= Site group, GF = Factor group. IR: infrared; Ra: Raman

**Table S 9: Correlation scheme for the internal modes of H2O in M2Co(H2P2O7)2.2H2O**

| GM = C2V | GS = C1 | GF = Ci |
| --- | --- | --- |
| 2A1(IR, Ra)  B2(IR, Ra) | 3 A (IR, Ra) | 3 Ag(Ra)  3 Au(IR) |
| Activities **G.M**  Raman 3  Infrared 3 Coincidences 3 | **G.S**.  3  3  3 | **G.F**  3  3  0 |

GM =Molecular group, Gs= Site group, GF = Factor group. IR: infrared; Ra: Raman

**Table S 10:**Correlation scheme for the external modes of (H2P2O7)2-, Co2+, M+ ions and H2O

**molecules in M2Co(H2P2O7)2.2H2O**

| External modes  R T | GS= C1 | GF = Ci | External modes  R T | |
| --- | --- | --- | --- | --- |
| 3 0  H2P2O72-  0 3 | A (IR, Ra) | Ag (Ra)  Au (IR) | | 3 3  3 3 |
|  | GS=C1 | GF= Ci | |  |
| 3 0  H2O  0 3 | A(Ra, IR) | Ag (Ra)  Au (IR) | | 3 3  3 3 |
| - 0  M+  - 3 |  | Ag (Ra)  Au (IR) | | - 3  - 3 |
| A(IR, Ra) |
| 0 -  Co2+  - 3 | GS= Ci | Ag (Ra)  Au (IR) | | - 0  - 3 |
| Ag(Ra)  Au(IR) |

R= Rotation, T= Translation, Gs= Site group, GF = Factor group. IR: infrared; Ra: Raman; M+ = K/N
